# Supplementary material for: HiSpike Method for High-Throughput Cost Effective Sequencing of the SARS-CoV-2 Spike Gene
Source: Front Med (Lausanne). 2022 Jan 11;8:798130. doi: 10.3389/fmed.2021.798130 (PMC8787038; doi:10.3389/fmed.2021.798130)
Supplement: Supplementary file 13 [file Table_13.xlsx]

## Sheet: nexclade
Supplementary file S13
Sample ID	clade	qc.overallScore	qc.overallStatus	totalSubstitutions	totalDeletions	totalInsertions	totalFrameShifts	totalAminoacidSubstitutions	totalAminoacidDeletions	totalMissing	totalNonACGTNs	totalPcrPrimerChanges	substitutions	deletions	insertions	frameShifts	aaSubstitutions	aaDeletions	missing	nonACGTNs	pcrPrimerChanges	alignmentScore	alignmentStart	alignmentEnd	qc.missingData.missingDataThreshold	qc.missingData.score	qc.missingData.status	qc.missingData.totalMissing	qc.mixedSites.mixedSitesThreshold	qc.mixedSites.score	qc.mixedSites.status	qc.mixedSites.totalMixedSites	qc.privateMutations.cutoff	qc.privateMutations.excess	qc.privateMutations.score	qc.privateMutations.status	qc.privateMutations.total	qc.snpClusters.clusteredSNPs	qc.snpClusters.score	qc.snpClusters.status	qc.snpClusters.totalSNPs	qc.frameShifts.frameShifts	qc.frameShifts.totalFrameShifts	qc.frameShifts.frameShiftsIgnored	qc.frameShifts.totalFrameShiftsIgnored	qc.frameShifts.score	qc.frameShifts.status	qc.stopCodons.stopCodons	qc.stopCodons.totalStopCodons
S-0397	21A (Delta)	16.81	good	4	6	0	0	5	2	1407	0	0	C21618G,T22917G,C22995A,C23604G	22029-22034			S:T19R,S:R158G,S:L452R,S:T478K,S:P681R	S:E156-,S:F157-	21744-21961,22295-22565,22782-22783,22787-22797,23215-23473,23818-23828,24090-24421,24790-25008,25301-25384			11424	21562	25384	3000	41	mediocre	1407	10	0	good	0	24	-8	0	good	0		0	good	0		0		0	0	good		0
S-0398	21J (Delta)	1.4e-05	good	10	6	0	0	9	2	301	0	0	C21618G,C21846T,G21987A,T22917G,C22995A,A23403G,C23557T,C23604G,G24410A,G25009A	22029-22034			S:T19R,S:T95I,S:G142D,S:R158G,S:L452R,S:T478K,S:D614G,S:P681R,S:D950N	S:E156-,S:F157-	22295-22516,23818-23819,24330-24406			11400	21562	25384	3000	0.037037	good	301	10	0	good	0	24	-7	0	good	1		0	good	0		0		0	0	good		0
S-0399	21J (Delta)	0	good	8	6	0	0	8	2	293	0	0	C21618G,G21987A,T22917G,C22995A,A23403G,C23604G,C24130T,G24410A	22029-22034			S:T19R,S:G142D,S:R158G,S:L452R,S:T478K,S:D614G,S:P681R,S:D950N	S:E156-,S:F157-	22317-22337,23818-23919,23939-24108			11408	21562	25384	3000	0	good	293	10	0	good	0	24	-8	0	good	0		0	good	0		0		0	0	good		0
S-0400	21J (Delta)	28.8409	good	5	0	0	0	5	0	1750	0	0	C21618G,C21846T,T22917G,C22995A,C23604G				S:T19R,S:T95I,S:L452R,S:T478K,S:P681R		21744-21790,21870-21991,22009-22074,22219-22566,22766-22797,23215-23473,23818-24420,24790-24978,25301-25384			11446	21562	25384	3000	53.7037	mediocre	1750	10	0	good	0	24	-8	0	good	0		0	good	0		0		0	0	good		0
S-0401	21J (Delta)	80.9914	mediocre	5	5	0	1	2	1	1643	0	0	C21846T,G21987A,T22917G,C22995A,C23604G	22031-22035		S:158-1274	S:T95I,S:G142D	S:F157-	21563,21608-21658,22029,22295-22546,22787-22828,23185-23473,23718-24421,24790-25008,25301-25384			11424	21562	25384	3000	49.7407	mediocre	1643	10	0	good	0	24	-8	0	good	0		0	good	0	S:158-1274	1		0	75	mediocre		0
S-0402	21J (Delta)	0	good	10	6	0	0	11	2	2	0	0	C21618G,G21987A,T22917G,C22995A,A23403G,C23604G,C23934T,G24173T,G24410A,A24774G	22029-22034			S:T19R,S:G142D,S:R158G,S:L452R,S:T478K,S:D614G,S:P681R,S:T791I,S:A871S,S:D950N,S:Q1071R	S:E156-,S:F157-	23818-23819			11400	21562	25384	3000	0	good	2	10	0	good	0	24	-6	0	good	2		0	good	0		0		0	0	good		0
S-0403	21J (Delta)	0	good	9	6	0	0	9	2	33	0	0	C21618G,G21987A,G22218A,T22917G,C22995A,A23403G,C23604G,C24130T,G24410A	22029-22034			S:T19R,S:G142D,S:R158G,S:G219D,S:L452R,S:T478K,S:D614G,S:P681R,S:D950N	S:E156-,S:F157-	22317-22337,22788-22797,23818-23819			11404	21562	25384	3000	0	good	33	10	0	good	0	24	-7	0	good	1		0	good	0		0		0	0	good		0
S-0404	21J (Delta)	1.15413	good	8	6	0	0	8	2	406	1	0	C21618G,G21987A,T22917G,C22995A,A23403G,C23604G,C24130T,G24410A	22029-22034			S:T19R,S:G142D,S:R158G,S:L452R,S:T478K,S:D614G,S:P681R,S:D950N	S:E156-,S:F157-	22317-22516,23818-23916,24002-24108	D:23984		11408	21562	25384	3000	3.92593	good	406	10	10	good	1	24	-8	0	good	0		0	good	0		0		0	0	good		0
S-0405	21J (Delta)	0	good	9	6	0	0	9	2	259	0	0	C21618G,C21846T,G21987A,T22917G,C22995A,A23403G,C23557T,C23604G,G24410A	22029-22034			S:T19R,S:T95I,S:G142D,S:R158G,S:L452R,S:T478K,S:D614G,S:P681R,S:D950N	S:E156-,S:F157-	22317-22516,23818-23875,24078			11404	21562	25384	3000	0	good	259	10	0	good	0	24	-8	0	good	0		0	good	0		0		0	0	good		0
S-0406	21A (Delta)	0.500425	good	7	6	0	0	8	2	491	0	0	C21618G,G21987A,T22917G,C22995A,A23403G,C23604G,G24410A	22029-22034			S:T19R,S:G142D,S:R158G,S:L452R,S:T478K,S:D614G,S:P681R,S:D950N	S:E156-,S:F157-	22317-22516,23818-24108			11412	21562	25384	3000	7.07407	good	491	10	0	good	0	24	-8	0	good	0		0	good	0		0		0	0	good		0
S-0407	21A (Delta)	0.554198	good	7	6	0	0	8	2	501	0	0	C21618G,G21987A,T22917G,C22995A,A23403G,C23604G,G24410A	22029-22034			S:T19R,S:G142D,S:R158G,S:L452R,S:T478K,S:D614G,S:P681R,S:D950N	S:E156-,S:F157-	22317-22516,22788-22797,23818-24108			11412	21562	25384	3000	7.44444	good	501	10	0	good	0	24	-8	0	good	0		0	good	0		0		0	0	good		0
S-0408	21J (Delta)	6.04796	good	8	6	0	0	8	2	964	0	0	C21618G,C21846T,G21987A,T22917G,C22995A,A23403G,C23557T,C23604G	22029-22034			S:T19R,S:T95I,S:G142D,S:R158G,S:L452R,S:T478K,S:D614G,S:P681R	S:E156-,S:F157-	22317-22516,23818-24421,24790-24925,24955-24978			11408	21562	25384	3000	24.5926	good	964	10	0	good	0	24	-8	0	good	0		0	good	0		0		0	0	good		0
S-0409	21A (Delta)	33.4684	mediocre	4	6	0	0	5	2	1862	0	0	C21618G,T22917G,C22995A,C23604G	22029-22034			S:T19R,S:R158G,S:L452R,S:T478K,S:P681R	S:E156-,S:F157-	21744-21991,22295-22546,22787-22828,23185-23473,23694-24421,24790-25008,25301-25384			11424	21562	25384	3000	57.8519	mediocre	1862	10	0	good	0	24	-8	0	good	0		0	good	0		0		0	0	good		0
S-0410	21J (Delta)	0.300466	good	9	6	0	0	9	2	448	0	0	C21618G,C21721T,C21846T,G21987A,T22917G,C22995A,A23403G,C23604G,G25352T	22029-22034			S:T19R,S:T95I,S:G142D,S:R158G,S:L452R,S:T478K,S:D614G,S:P681R,S:V1264L	S:E156-,S:F157-	21632-21658,22317-22516,23848-23916,24037-24078,24108,24170-24216,24330-24391			11404	21562	25384	3000	5.48148	good	448	10	0	good	0	24	-5	0	good	3		0	good	0		0		0	0	good		0
S-0411	21A (Delta)	16.3548	good	5	0	0	0	5	0	1358	1	0	C21618G,G21987A,T22917G,C22995A,C23604G				S:T19R,S:G142D,S:L452R,S:T478K,S:P681R		22295-22546,22787-22827,23185-23319,23343-23472,23818-24145,24170-24421,24760-24925,24955-25008	R:22218		11446	21562	25384	3000	39.1852	mediocre	1358	10	10	good	1	24	-8	0	good	0		0	good	0		0		0	0	good		0
S-0412	21A (Delta)	2.22783	good	8	6	0	0	9	2	703	0	0	C21618G,G21987A,G22899T,T22917G,C22995A,A23403G,C23604G,G24410A	22029-22034			S:T19R,S:G142D,S:R158G,S:G446V,S:L452R,S:T478K,S:D614G,S:P681R,S:D950N	S:E156-,S:F157-	22317-22546,22787-22797,23818-23912,24041-24108,24170-24216,24330-24392,24790-24978			11408	21562	25384	3000	14.9259	good	703	10	0	good	0	24	-7	0	good	1		0	good	0		0		0	0	good		0
S-0413	21J (Delta)	1.20187	good	8	6	0	0	9	2	596	0	0	C21618G,C21846T,G21987A,T22917G,C22995A,A23403G,C23604G,A24110C	22029-22034			S:T19R,S:T95I,S:G142D,S:R158G,S:L452R,S:T478K,S:D614G,S:P681R,S:I850L	S:E156-,S:F157-	22317-22516,22787-22797,23818-23819,24170-24392,24790-24925,24955-24978			11408	21562	25384	3000	10.963	good	596	10	0	good	0	24	-7	0	good	1		0	good	0		0		0	0	good		0
S-0414	21J (Delta)	3.17368	good	8	6	0	0	9	2	781	0	0	C21618G,C21846T,G21987A,T22917G,C22995A,C23604G,G24410A,G25012T	22029-22034			S:T19R,S:T95I,S:G142D,S:R158G,S:L452R,S:T478K,S:P681R,S:D950N,S:E1150D	S:E156-,S:F157-	22295-22546,22787-22797,23215-23443,23820-24108			11408	21562	25384	3000	17.8148	good	781	10	0	good	0	24	-7	0	good	1		0	good	0		0		0	0	good		0
S-0415	21J (Delta)	3.62409	good	8	6	0	0	8	2	814	0	0	C21618G,C21846T,G21987A,T22917G,C22995A,C23604G,G24410A,T24565C	22029-22034			S:T19R,S:T95I,S:G142D,S:R158G,S:L452R,S:T478K,S:P681R,S:D950N	S:E156-,S:F157-	22295-22516,23215-23473,23819-23910,24004-24078,24790-24955			11408	21562	25384	3000	19.037	good	814	10	0	good	0	24	-7	0	good	1		0	good	0		0		0	0	good		0
S-0416	21J (Delta)	18.3611	good	7	0	0	0	6	0	1425	1	0	C21846T,T22917G,C22995A,C23604G,C23981A,G23984A,T24565C				S:T95I,S:L452R,S:T478K,S:P681R,S:P807T,S:D808N		21563-21716,21744-21773,22009-22074,22218-22546,22787-22828,23185-23272,23390-23473,23753-23890,24041-24391,24790-24825,24956-24978,25301-25384	R:24040		11438	21562	25384	3000	41.6667	mediocre	1425	10	10	good	1	24	-5	0	good	3		0	good	0		0		0	0	good		0
S-0417	21I (Delta)	21.8816	good	4	0	0	0	4	0	1563	0	0	C21618G,T22917G,C22995A,C23604G				S:T19R,S:L452R,S:T478K,S:P681R		21744-21991,22009-22076,22219-22546,23215-23473,23818-23906,24041-24391,24790-24925,24955,25302-25384			11450	21562	25384	3000	46.7778	mediocre	1563	10	0	good	0	24	-8	0	good	0		0	good	0		0		0	0	good		0
S-0418	21A (Delta)	47.1511	mediocre	4	0	0	0	4	0	2154	0	0	T22917G,C22995A,G23120T,C23604G				S:L452R,S:T478K,S:A520S,S:P681R		21563-22074,22219-22786,23215-23473,23818-23918,24041-24421,24760-25008,25301-25384			11450	21562	25384	3000	68.6667	mediocre	2154	10	0	good	0	24	-7	0	good	1		0	good	0		0		0	0	good		0
S-0419	21J (Delta)	0	good	10	6	0	0	11	2	202	0	0	C21614T,C21618G,C21846T,G21987A,T22917G,C22995A,A23403G,C23604G,G24368T,G24410A	22029-22034			S:L18F,S:T19R,S:T95I,S:G142D,S:R158G,S:L452R,S:T478K,S:D614G,S:P681R,S:D936Y,S:D950N	S:E156-,S:F157-	22317-22516,23818-23819			11400	21562	25384	3000	0	good	202	10	0	good	0	24	-6	0	good	2		0	good	0		0		0	0	good		0
S-0420	21J (Delta)	0	good	9	6	0	0	9	2	34	0	0	C21618G,C21846T,G21987A,T22917G,C22995A,A23403G,C23557T,C23604G,G24410A	22029-22034			S:T19R,S:T95I,S:G142D,S:R158G,S:L452R,S:T478K,S:D614G,S:P681R,S:D950N	S:E156-,S:F157-	22317-22337,22787-22797,23818-23819			11404	21562	25384	3000	0	good	34	10	0	good	0	24	-8	0	good	0		0	good	0		0		0	0	good		0
S-0421	20A	59.6899	mediocre	2	6	0	0	3	2	2386	0	0	C21618G,C23604G	22029-22034			S:T19R,S:R158G,S:P681R	S:E156-,S:F157-	21744-21991,22219-22546,22817-23284,23372-23473,23493-23596,23693-24421,24760-25008,25227-25384			11432	21562	25384	3000	77.2593	mediocre	2386	10	0	good	0	24	-8	0	good	0		0	good	0		0		0	0	good		0
S-0422	21J (Delta)	0	good	11	6	0	0	11	2	32	0	0	C21618G,C21811T,C21846T,G21987A,C22530T,T22917G,C22995A,C22997T,A23403G,C23604G,G24410A	22029-22034			S:T19R,S:T95I,S:G142D,S:R158G,S:T323I,S:L452R,S:T478K,S:P479S,S:D614G,S:P681R,S:D950N	S:E156-,S:F157-	22317-22337,22788-22796,23818-23819			11396	21562	25384	3000	0	good	32	10	0	good	0	24	-6	0	good	2		0	good	0		0		0	0	good		0
S-0423	21J (Delta)	0	good	10	6	0	0	10	2	31	0	0	C21618G,T21633C,C21846T,G21987A,T22917G,C22995A,T23296C,A23403G,C23604G,G24410A	22029-22034			S:T19R,S:L24S,S:T95I,S:G142D,S:R158G,S:L452R,S:T478K,S:D614G,S:P681R,S:D950N	S:E156-,S:F157-	22317-22337,22788-22797			11400	21562	25384	3000	0	good	31	10	0	good	0	24	-6	0	good	2		0	good	0		0		0	0	good		0
S-0424	21J (Delta)	0.043018	good	7	6	0	0	7	2	356	0	0	C21618G,G21987A,T22917G,C22995A,G23120T,C23604G,C24130T	22029-22034			S:T19R,S:G142D,S:R158G,S:L452R,S:T478K,S:A520S,S:P681R	S:E156-,S:F157-	22317-22448,23213-23271,23373-23473,23818-23819,24330-24391			11412	21562	25384	3000	2.07407	good	356	10	0	good	0	24	-6	0	good	2		0	good	0		0		0	0	good		0
S-0425	21J (Delta)	0	good	10	6	0	0	10	2	25	0	0	C21618G,T21633C,C21846T,G21987A,T22917G,C22995A,A23403G,C23604G,G24410A,G25012A	22029-22034			S:T19R,S:L24S,S:T95I,S:G142D,S:R158G,S:L452R,S:T478K,S:D614G,S:P681R,S:D950N	S:E156-,S:F157-	22325-22337,22788-22797,23818-23819			11400	21562	25384	3000	0	good	25	10	0	good	0	24	-6	0	good	2		0	good	0		0		0	0	good		0
S-0426	21A (Delta)	47.0494	mediocre	3	0	0	0	3	0	2152	0	0	T22917G,C22995A,C23604G				S:L452R,S:T478K,S:P681R		21609-22565,22768-22786,22817-22827,23185-23473,23818-24420,24790-24978,25301-25384			11454	21562	25384	3000	68.5926	mediocre	2152	10	0	good	0	24	-8	0	good	0		0	good	0		0		0	0	good		0
S-0427	21J (Delta)	0	good	9	6	0	0	9	2	107	0	0	C21618G,G21987A,T22917G,G22984T,C22995A,A23403G,C23604G,C24130T,G24410A	22029-22034			S:T19R,S:G142D,S:R158G,S:L452R,S:Q474H,S:T478K,S:D614G,S:P681R,S:D950N	S:E156-,S:F157-	22295-22399,23818-23819			11404	21562	25384	3000	0	good	107	10	0	good	0	24	-7	0	good	1		0	good	0		0		0	0	good		0
S-0428	21A (Delta)	56.8069	mediocre	2	0	0	0	2	0	2335	0	0	T22917G,C22995A				S:L452R,S:T478K		21563-22096,22218-22565,22768-22828,23184-23919,24039-24421,24790-24978,25301-25384			11458	21562	25384	3000	75.3704	mediocre	2335	10	0	good	0	24	-8	0	good	0		0	good	0		0		0	0	good		0
S-0429	21A (Delta)	4.63047	good	9	6	0	0	9	2	881	0	0	C21618G,G21987A,A22255G,C22858T,T22917G,C22995A,A23403G,C23604G,G24410A	22029-22034			S:T19R,S:G142D,S:R158G,S:I231M,S:L452R,S:T478K,S:D614G,S:P681R,S:D950N	S:E156-,S:F157-	21744-21957,22317-22516,22787-22797,23819-24108,24790-24955			11404	21562	25384	3000	21.5185	good	881	10	0	good	0	24	-6	0	good	2		0	good	0		0		0	0	good		0
S-0430	21A (Delta)	79.0782	mediocre	5	0	0	0	4	0	2701	0	0	T22917G,G22927A,C22995A,C23043T,C23604G				S:L452R,S:T478K,S:S494L,S:P681R		21563-22546,22785-22797,23215-23557,23693-24538,24642-24646,24657-25008,25227-25384			11446	21562	25384	3000	88.9259	mediocre	2701	10	0	good	0	24	-6	0	good	2		0	good	0		0		0	0	good		0
S-0431	21A (Delta)	0.006639	good	8	6	0	0	8	2	322	0	0	C21618G,G21987A,T22917G,C22995A,A23403G,C23604G,G23611T,G24410A	22029-22034			S:T19R,S:G142D,S:R158G,S:L452R,S:T478K,S:D614G,S:P681R,S:D950N	S:E156-,S:F157-	22317-22337,22788-22797,23818-24108			11408	21562	25384	3000	0.814815	good	322	10	0	good	0	24	-7	0	good	1		0	good	0		0		0	0	good		0
S-0432	21A (Delta)	8.43149	good	5	6	0	0	6	2	1084	0	0	C21618G,G21987A,T22917G,C22995A,C23604G	22029-22034			S:T19R,S:G142D,S:R158G,S:L452R,S:T478K,S:P681R	S:E156-,S:F157-	22295-22516,23215-23473,23819-24421			11420	21562	25384	3000	29.037	good	1084	10	0	good	0	24	-8	0	good	0		0	good	0		0		0	0	good		0
S-0433	21A (Delta)	32.3635	mediocre	4	0	0	0	4	0	1836	0	0	T22917G,C22995A,C23604G,G24410A				S:L452R,S:T478K,S:P681R,S:D950N		21563-22546,22768-22797,23215-23472,23818-24108,24790-24978,25301-25384			11450	21562	25384	3000	56.8889	mediocre	1836	10	0	good	0	24	-8	0	good	0		0	good	0		0		0	0	good		0
S-0434	21J (Delta)	60.7822	mediocre	2	0	0	0	1	0	2405	0	0	C22995A,C23604G				S:T478K		21714-22074,22219-22546,22787-22930,23049-23500,23522-23603,23693-24145,24170-24421,24760-24925,24955-25008,25251-25279,25301-25384			11458	21562	25384	3000	77.963	mediocre	2405	10	0	good	0	24	-8	0	good	0		0	good	0		0		0	0	good		0
S-0435	21J (Delta)	0.857339	good	10	6	0	0	9	2	550	0	0	C21618G,C21846T,G21987A,T22917G,C22995A,A23403G,C23557T,C23604G,A24325G,G24410A	22029-22034			S:T19R,S:T95I,S:G142D,S:R158G,S:L452R,S:T478K,S:D614G,S:P681R,S:D950N	S:E156-,S:F157-	22295-22546,22787-22797,23819-24105			11400	21562	25384	3000	9.25926	good	550	10	0	good	0	24	-7	0	good	1		0	good	0		0		0	0	good		0
S-0436	21A (Delta)	0.210919	good	7	6	0	0	8	2	424	0	0	C21618G,G21987A,T22917G,C22995A,A23403G,C23604G,G24410A	22029-22034			S:T19R,S:G142D,S:R158G,S:L452R,S:T478K,S:D614G,S:P681R,S:D950N	S:E156-,S:F157-	22295-22448,22788-22797,23819-24078			11412	21562	25384	3000	4.59259	good	424	10	0	good	0	24	-8	0	good	0		0	good	0		0		0	0	good		0
S-0437	21J (Delta)	17.3303	good	5	0	0	0	5	0	1424	0	0	C21846T,T22917G,C22995A,A23403G,C23604G				S:T95I,S:L452R,S:T478K,S:D614G,S:P681R		21609-21635,21744-21778,21914-21961,21992-22054,22295-22546,22787-22888,23185-23213,23818-23918,23999-24404,24790-25066,25301-25384			11446	21562	25384	3000	41.6296	mediocre	1424	10	0	good	0	24	-8	0	good	0		0	good	0		0		0	0	good		0
S-0438	20A	5.53121	good	1	0	0	0	1	0	935	0	0	A23403G				S:D614G		22039-22075,22217-22546,23818-24108,24330-24417,24790-24978			11462	21562	25384	3000	23.5185	good	935	10	0	good	0	24	-8	0	good	0		0	good	0		0		0	0	good		0
S-0439	19A	1.27606	good	1	0	0	0	0	0	605	0	0	G24928T						22317-22337,23185-23473,23818-24105,25301-25307			11462	21562	25384	3000	11.2963	good	605	10	0	good	0	24	-7	0	good	1		0	good	0		0		0	0	good		0
S-0440	21K (Omicron)	7.60428	good	16	15	0	0	16	5	1036	0	0	C21762T,C21846T,G22578A,G22599A,T22673C,C22674T,T22679C,C22686T,C22995A,C23525T,T23599G,C23604A,C24130A,A24424T,T24469A,C24503T	21765-21770,21987-21995			S:A67V,S:T95I,S:Y145D,S:G339D,S:R346K,S:S371L,S:S373P,S:S375F,S:T478K,S:H655Y,S:N679K,S:P681H,S:N856K,S:Q954H,S:N969K,S:L981F	S:H69-,S:V70-,S:G142-,S:V143-,S:Y144-	22039-22074,22218-22448,22787-22828,22904-22926,23050-23122,23147-23152,23185-23473,23818-23919,24039-24105,24790-24925,24948-24978			11341	21562	25384	3000	27.2593	good	1036	10	0	good	0	24	1	4.16667	good	9		0	good	0		0		0	0	good		0
S-0441	21K (Omicron)	0	good	30	18	9	0	30	6	170	0	0	C21762T,C21846T,G22578A,G22599A,T22673C,C22674T,T22679C,C22686T,T22882G,G22898A,G22992A,C22995A,A23013C,A23040G,G23048A,A23055G,A23063T,T23075C,C23202A,A23403G,C23525T,T23599G,C23604A,C23854A,G23948T,C24130A,A24424T,T24469A,C24503T,C25000T	21765-21770,21987-21995,22194-22196	22205:GAGCCAGAA		S:A67V,S:T95I,S:Y145D,S:L212I,S:G339D,S:R346K,S:S371L,S:S373P,S:S375F,S:N440K,S:G446S,S:S477N,S:T478K,S:E484A,S:Q493R,S:G496S,S:Q498R,S:N501Y,S:Y505H,S:T547K,S:D614G,S:H655Y,S:N679K,S:P681H,S:N764K,S:D796Y,S:N856K,S:Q954H,S:N969K,S:L981F	S:H69-,S:V70-,S:G142-,S:V143-,S:Y144-,S:N211-	22295-22448,22787-22802			11261	21562	25384	3000	0	good	170	10	0	good	0	24	-6	0	good	2		0	good	0		0		0	0	good		0
[truncated: 3 more columns]
